# Supplementary material
Source: MDPI journal article supplement (https://www.mdpi.com/2673-9976/4/1/46)
Supplement: s1 [file s1]

**Abstract:** There are imperative to opportunistic skin pathogens and skin commensals for *Malassezia* genus of the yeasts. Recently, in the eastern and western US nine types of bats skins were isolated as new *Malassezia* species in the subfamily *Myotinae*. Factually, wild-type *Malassezia* are typically susceptible to azoles because of the developed azole resistance except for fluconazole this has been related to either alterations or quadruplication on the *ERG11* gene. Because of developed resistance substitute antifungal drugs like chlorhexidine, and plant essential oils used. The purposes of this investigation were to assess atopic dermatitis (AD) along with in *Malassezia* species and the effect of the inhibition by different plants essential oils against pathogenic *Malassezia* isolates. The yeasts of the class *Malassezia* are known for causing different ailments in human skin like psoriasis, atopic dermatitis, dandruff, seborrheic dermatitis, folliculitis, *Malassezia* (*Pityrosporum*) and *Pityriasis versicolor*, and—less generally—with other dermatologic issues, for example, transient acantholytic dermatosis, onychomycosis, and reticulated and confluent papillomatosis. These days, the medications accessible to treat this fungal infection are not many. In order to treat fungal infections, there was an urgent need for test the capacity of different essential oils in treating against *Malassezia* species.

**Keywords:** *Malassezia strains*; phytochemicals; essential oils; antifungal activity; atopic dermatitis; *Pityriasis versicolor*; dandruff.

## Introduction

*Malassezia* class incorporates a cluster of lipophilic and typically lipid-subordinate yeasts perceived as individuals from the ordinary skin microbiome of both human and other homoeothermic life forms. *Malassezia* is an unscrupulous species and when certain conditions they may also cause folliculitis, and *Pityriasis (P) versicolor*, can be related with exacerbate numerous dermal infections like atopic dermatitis. Typically, these *Malassezia*-related fungal infections are treated with topical therapies. Polyenes and azoles like ketoconazole, itraconazole, and posaconazole are most often used against *Malassezia*-related fungal infections. Though, the development of resistance to the existing antifungals in the market exposed that the progress in novel antifungals is essential approach to overwhelmed problems come across in treating this infection. The main purpose of this review is inhibiting effects of EOs towards *Malassezia*-related fungal diseases have been studied to indication on their probable effects.

## Materials and Methods

Data on inhibitory potential of essential oils from various plants against *Malassezia* species was collected from online data bases such as Science Direct, Scopus, PubMed, Taylor, Web of Science, Google Scholar published materials, including E-books. Covering the period from January 2008 and November 2020.

## Results and Discussion

Author's reported various essential oils against *Malassezia spp.* with evaluating dissimilar assays to antifungal properties. The most used assay is broth microdilution, followed by the vapor phase method and agar disk diffusion tests. All the authors stated in tables with their antifungal activity of various essential oils and also their MIC ( $\mu\text{g/ml}$ ) values against various *Malassezia spp.*

**Table-S1** Activity of EOs against *Malassezia* species using the broth microdilution method, the MIC standards in  $\mu\text{g/ml}$  or  $\mu\text{L}$

| Source                                                | Main constituents                     | MIC                                                                                                                                                               |
|-------------------------------------------------------|---------------------------------------|-------------------------------------------------------------------------------------------------------------------------------------------------------------------|
| <i>Cinnamomum zeylanicum</i>                          | cinnamaldehyde, eugenol               | 32 $\mu\text{g/ml}$                                                                                                                                               |
| <i>Ocimum kilimandscharicum</i>                       | camphor, limonene, camphene           | 128 $\mu\text{g/ml}$                                                                                                                                              |
| <i>Malaleuca leucadendrum</i> (L.)                    | 1,8 cineole, p-cymene, linalool       | 64 $\mu\text{g/ml}$                                                                                                                                               |
| <i>Malaleuca alternifolia</i> (Maiden & Betche) Cheel | not specified                         | 32 $\mu\text{g/ml}$                                                                                                                                               |
| <i>Zataria multiflora</i> Boiss.                      | thymol, carvacrol                     | 35 $\mu\text{g/ml}$ , 30 $\mu\text{g/ml}$ , 80 $\mu\text{g/ml}$<br>50 $\mu\text{g/ml}$ , 60 $\mu\text{g/ml}$ , 30 $\mu\text{g/ml}$<br>40 $\mu\text{g/ml}$         |
| <i>Thymus kotschyianus</i> Boiss.                     | thymol, carvacrol                     | 60 $\mu\text{g/ml}$ , 60 $\mu\text{g/ml}$ , 80 $\mu\text{g/ml}$<br>80 $\mu\text{g/ml}$ , 80 $\mu\text{g/ml}$ , 30 $\mu\text{g/ml}$<br>110 $\mu\text{g/ml}$        |
| <i>Mentha spicata</i> L.                              | carvone, limonene                     | 125 $\mu\text{g/ml}$ , 100 $\mu\text{g/ml}$<br>100 $\mu\text{g/ml}$ , 250 $\mu\text{g/ml}$<br>85 $\mu\text{g/ml}$ , 65 $\mu\text{g/ml}$ , 85 $\mu\text{g/ml}$     |
| <i>Artemisia sieberi</i>                              | $\alpha$ thujone, $\beta$ thujone     | 250 $\mu\text{g/ml}$ , 85 $\mu\text{g/ml}$<br>150 $\mu\text{g/ml}$ , 50 $\mu\text{g/ml}$<br>155 $\mu\text{g/ml}$ , 110 $\mu\text{g/ml}$                           |
| <i>Salvia rosmarinus</i> Schleid                      | $\alpha$ pinene, 1,8 cineole linalool | 260 $\mu\text{g/ml}$ , 250 $\mu\text{g/ml}$<br>420 $\mu\text{g/ml}$ , 410 $\mu\text{g/ml}$<br>850 $\mu\text{g/ml}$ , 100 $\mu\text{g/ml}$<br>350 $\mu\text{g/ml}$ |
| <i>Syzygium aromaticum</i> (L.) Merrill & Perry       | eugenol and $\beta$ caryophyllene     | 0.625 $\mu\text{L/ml}$                                                                                                                                            |
| <i>Foeniculum vulgare</i> Mill                        | not specified                         | 1.250 $\mu\text{L/ml}$                                                                                                                                            |
| <i>Trachyspermum ammi</i> L.                          | not specified                         | 0.312 $\mu\text{L/ml}$                                                                                                                                            |

**Table-S2** Activity of some EOs obtained by steam distillation and tested by different methods: Disk diffusion (1-9), Vapour phase (10)

| Essential oils                                        | Active compounds                    | Zone of Inhibition            |
|-------------------------------------------------------|-------------------------------------|-------------------------------|
| <i>Cinnamomum zeylanicum</i> Blume                    | cinnamaldehyde, eugenol             | 14 +/- 0.51 mm                |
| <i>Ocimum kilimandscharicum</i> Gürke                 | camphor, limonene, camphene         | 8 +/- 0.057 mm                |
| <i>Eucalyptus globulus</i> Labill.                    | cineol, p-cymene                    | 0mm                           |
| <i>Malaleuca leucadendrum</i> (L.) L.                 | 1,8 cineole                         | 12 +/- 0 mm                   |
| <i>Malaleuca alternifolia</i> (Maiden & Betche) Cheel | p-cymene, linalool                  | 22 +/- 0.057 mm               |
| <i>Pongamia glabra</i> Vent.                          | not specified                       | 0 mm                          |
| <i>Lavandula stoechas</i> L.                          | karanjin, pongapin, pongaglabrone   | 0 mm                          |
|                                                       | fenchone, camphor,                  | 46.7 +/- 8.2 mm               |
|                                                       | 1,8 cineole                         | 50 +/- 0 mm                   |
| <i>Cuminum cyminum</i> L.                             |                                     | 43.7 +/- 12.5 mm              |
|                                                       | $\alpha$ pinene, 1,8 cineole        | 50 +/- 0 mm                   |
|                                                       | linalool                            | 50 +/- 0 mm                   |
| <i>Artemisia sieberi</i> Besser                       |                                     | 50 +/- 0 mm                   |
|                                                       | $\alpha$ thujone, camphor           | 43.3 +/- 14.1 mm              |
|                                                       | $\beta$ thujone                     | 35 +/- 14.1mm                 |
| <i>Artemisia annua</i> L.                             |                                     | 32.5 +/- 11.9 mm              |
|                                                       | Volatile emissions: $\alpha$ pinene | MIC - 0.41 $\mu\text{L/cm}^3$ |
|                                                       | 1,8 cineole, camphor                | MIC - 0.34 $\mu\text{L/cm}^3$ |

## Conclusion

This study will provide much more intelligences on current trends on the activity of EOs those which inhibits various *Malassezia* species, by different assay methods like broth microdilution, vapor phase method, and agar disk diffusion tests. Nowadays essential oils have been mainly examined against microbials as for more efficacy, less side effects, low cost, and decreased resistance. From this above study results it is proven that the essential oils have promising role to against to fight *Malassezia*-related dermal infections. Though, essential oils might signify thought-provoking constituents for medical applications. These days, the medications accessible to treat this fungal infection are not many. In order to treat fungal infections there was an urgent need for test the capacity of different essential oils in treating against *Malassezia* species.

## References

- Bilia, A. R., Guccione, C., Isacchi, B., Righeschi, C., Firenzoli, F., Bergonzi, M. C., 2014. Essential oils loaded in nanosystems: a developing strategy for a successful therapeutic approach. *Ev-Based Compl. Altern. Med.*, 2014(6):651593 <http://dx.doi.org/10.1155/2014/651593>.
- Baser, K. H. C., Buchbauer, G. (2015). Handbook of essential oils: science, technology, and applications. CRC press.
- Nazzaro, F., Fratianni, F., De Martino, L., Coppola, R., De Feo, V., 2013. Effect of essential oils on pathogenic bacteria. *Pharmaceuticals*, 6(12), 1451-1474. doi: 10.3390/ph6121451.
- Andrade, B. F. M. T., Barbosa, L. N., Probst, I. S., Júnior, A. F., 2014. Antimicrobial activity of essential oils. *J. Ess. Oil Res.*, 26(1), 34-40. <http://dx.doi.org/10.1080/10412905.2013.860409>
- Adorjan, B., Buchbauer, G., 2010. Biological properties of essential oils: an updated review. *Flav. Frag. J.* 25(6), 407-426. <https://doi.org/10.1002/ffj.2024>
- Bakkali, F., Averbeck, S., Averbeck, D., Idaomar, M., 2008. Biological effects of essential oils—a review. *Food Chem. Toxic.*, 46(2), 446-475. <https://doi.org/10.1016/j.fct.2007.09.106>
- Franz, C. M. (2010). Essential oil research: past, present and future. *Flav. Fragr. J.*, 25(3), 112-113. <https://doi.org/10.1002/ffj.1983>
- Santomauro, F., Donato, R., Sacco, C., Pini, G., Flaminio, G., Bilia, A.R., 2016. Vapour and liquid-Phase *Artemisia annua* essential oil activities against several clinical strains of *Candida*. *Planta Med.* 2016 Jul;82(11-12):1016-20. doi: 10.1055/s-0042-108740
